# Supplementary material
Source: Springer Nature journal article supplement (https://www.springermedizin.de/resource/supplementary/13075_2004_1370_MOESM4_ESM.pdf/9689624)

**Fig 4**

**a**

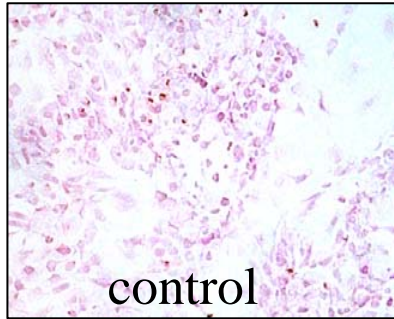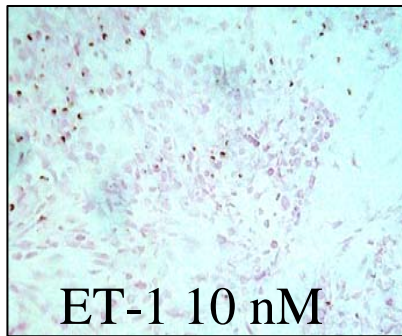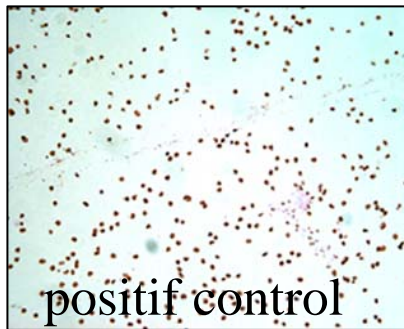

**b**

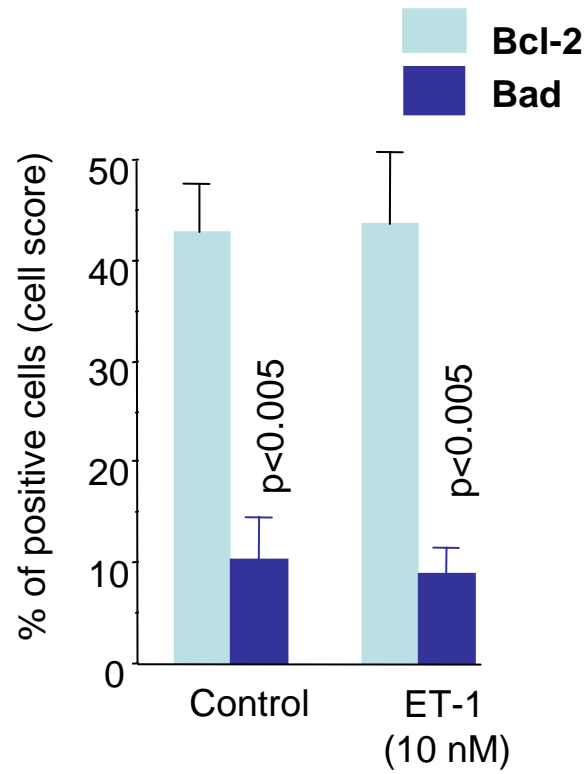

**c**

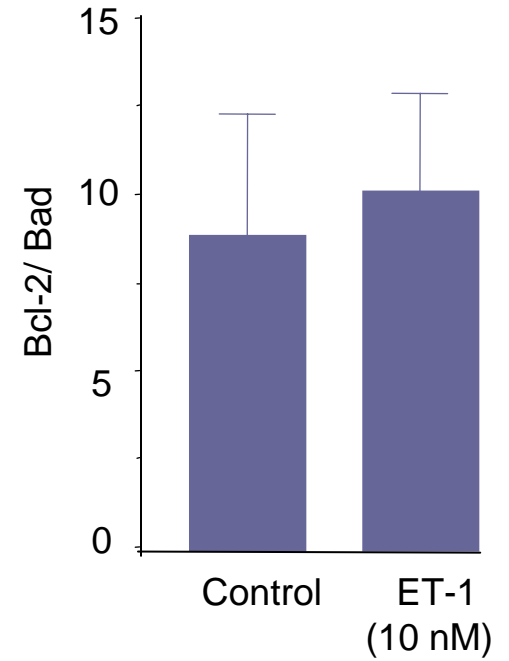

Supplement: MOESM4 [file 9689624]
